# Supplementary material
Source: PubMed Central journal article supplement (PMC5087595)
Supplement: NIHMS823490-supplement-Supplement.pdf [file NIHMS823490-supplement-Supplement.pdf]

# Supplementary Online Content

Mills KT, Chen J, Yang W, et al. Sodium excretion and the risk of cardiovascular disease in patients with chronic kidney disease. *JAMA*. doi:10.1001/jama.2016.4447.

eTable 1. Hazard Ratios and 95% Confidence Intervals of Composite Cardiovascular Disease, Congestive Heart Failure, Myocardial Infarction, and Stroke According to Quartile of 24-Hour Urinary Sodium Excretion

eTable 2. Hazard Ratios and 95% Confidence Intervals of Composite Cardiovascular Disease, Congestive Heart Failure, Myocardial Infarction, and Stroke Associated with a 1,000 mg difference in Calibrated 24-Hour Urinary Sodium Excretion with Additional Adjustment for Total Calorie Intake and Systolic Blood Pressure

eTable 3. Characteristics of 3,757 Patients with Chronic Kidney Disease According to Quartile of Calibrated 24-Hour Urinary Potassium Excretion, the Chronic Renal Insufficiency Cohort Study

eTable 4. Hazard Ratios and 95% Confidence Intervals of Composite Cardiovascular Disease, Congestive Heart Failure, Myocardial Infarction, and Stroke According to Quartile of Calibrated 24-Hour Urinary Potassium Excretion

eTable 5. P-values for Non-linear and Linear Associations between 24-hour Urinary Sodium Excretion and Cardiovascular Disease: Restricted Cubic Spline Regression using Alternate Numbers of Knots and Middle Knot Locations

eFigure 1. Multiple-adjusted Hazard Ratios and 95% Confidence Intervals of (A) Composite Cardiovascular Disease, (B) Congestive Heart Failure, (C) Myocardial Infarction, and (D) Stroke associated with 24-hour Urinary Sodium Excretion

eFigure 2. Cumulative Kaplan Meier Estimates of (A) Composite Cardiovascular Disease, (B) Congestive Heart Failure, (C) Myocardial Infarction, and (D) Stroke According to Quartile of Calibrated 24-Hour Urinary Potassium Excretion

eFigure 3. Multiple-adjusted Hazard Ratios and 95% Confidence Intervals of (A) Composite Cardiovascular Disease, (B) Congestive Heart Failure, (C) Myocardial Infarction, and (D) Stroke associated with Calibrated 24-hour Urinary Potassium Excretion

This supplementary material has been provided by the authors to give readers additional information about their work.

**eTable 1. Hazard Ratios and 95% Confidence Intervals of Composite Cardiovascular Disease, Congestive Heart Failure, Myocardial Infarction, and Stroke According to Quartile of 24-Hour Urinary Sodium Excretion**

| Variable                                                                                      | N     | Urinary Sodium Excretion, mg/24 hours |                   |                   |                   | P for trend |
|-----------------------------------------------------------------------------------------------|-------|---------------------------------------|-------------------|-------------------|-------------------|-------------|
|                                                                                               |       | <2,686                                | 2,687 – 3,532     | 3,533 – 4,473     | ≥4,474            |             |
| No. of Participants                                                                           |       | 940                                   | 939               | 939               | 939               |             |
| <b>Composite CVD<sup>a</sup></b>                                                              |       |                                       |                   |                   |                   |             |
| Events                                                                                        |       | 198                                   | 180               | 218               | 208               |             |
| Person-years                                                                                  |       | 5,484                                 | 5,659             | 5,676             | 5,707             |             |
| Cumulative Incidence <sup>b</sup> , % (95% Confidence Interval) at median 6.8 years follow-up |       | 17.7 (15.3, 20.0)                     | 18.3 (15.9, 20.7) | 23.8 (21.0, 26.5) | 27.9 (24.5, 31.2) | <0.001      |
| Hazard Ratio (95% Confidence Intervals)                                                       |       |                                       |                   |                   |                   |             |
| Model 1                                                                                       | 3,736 | 1.0                                   | 1.05 (0.85, 1.29) | 1.43 (1.16, 1.76) | 1.74 (1.38, 2.18) | <0.001      |
| p-value                                                                                       |       |                                       | 0.67              | <0.001            | <0.001            |             |
| Model 2                                                                                       | 3,528 | 1.0                                   | 0.92 (0.74, 1.15) | 1.30 (1.04, 1.63) | 1.28 (1.00, 1.63) | 0.008       |
| p-value                                                                                       |       |                                       | 0.46              | 0.02              | 0.05              |             |
| Model 3                                                                                       | 3,528 | 1.0                                   | 0.94 (0.75, 1.17) | 1.32 (1.06, 1.65) | 1.35 (1.05, 1.72) | 0.002       |
| p-value                                                                                       |       |                                       | 0.58              | 0.01              | 0.02              |             |
| <b>Congestive Heart Failure</b>                                                               |       |                                       |                   |                   |                   |             |
| Events                                                                                        |       | 147                                   | 124               | 153               | 151               |             |
| Person-years                                                                                  |       | 5,659                                 | 5,855             | 5,954             | 5,920             |             |
| Cumulative Incidence <sup>b</sup> , % (95% Confidence Interval) at median 6.8 years follow-up |       | 12.9 (10.9, 15.0)                     | 12.7 (10.6, 14.8) | 17.0 (14.5, 19.4) | 21.3 (18.0, 24.4) | <0.001      |

| Variable                                                                                      | N     | Urinary Sodium Excretion, mg/24 hours |                   |                   |                   | P for trend |
|-----------------------------------------------------------------------------------------------|-------|---------------------------------------|-------------------|-------------------|-------------------|-------------|
|                                                                                               |       | <2,686                                | 2,687 – 3,532     | 3,533 – 4,473     | ≥4,474            |             |
| Hazard Ratio (95% Confidence Intervals)                                                       |       |                                       |                   |                   |                   |             |
| Model 1                                                                                       | 3,741 | 1.0                                   | 0.98 (0.77, 1.26) | 1.37 (1.07, 1.75) | 1.78 (1.36, 2.32) | <0.001      |
| p-value                                                                                       |       |                                       | 0.90              | 0.01              | <0.001            |             |
| Model 2                                                                                       | 3,533 | 1.0                                   | 0.84 (0.64, 1.09) | 1.17 (0.90, 1.52) | 1.17 (0.88, 1.57) | 0.08        |
| p-value                                                                                       |       |                                       | 0.19              | 0.24              | 0.28              |             |
| Model 3                                                                                       | 3,533 | 1.0                                   | 0.86 (0.66, 1.12) | 1.18 (0.91, 1.54) | 1.25 (0.94, 1.67) | 0.03        |
| p-value                                                                                       |       |                                       | 0.27              | 0.20              | 0.12              |             |
| <b>Myocardial Infarction</b>                                                                  |       |                                       |                   |                   |                   |             |
| Events                                                                                        |       | 76                                    | 70                | 77                | 82                |             |
| Person-years                                                                                  |       | 5,949                                 | 6,015             | 6,109             | 6,202             |             |
| Cumulative Incidence <sup>b</sup> , % (95% Confidence Interval) at median 6.8 years follow-up |       | 7.2 (5.5, 8.9)                        | 7.4 (5.7, 9.1)    | 8.5 (6.6, 10.4)   | 10.9 (8.4, 13.3)  | 0.01        |
| Hazard Ratio (95% Confidence Intervals)                                                       |       |                                       |                   |                   |                   |             |
| Model 1                                                                                       | 3,751 | 1.0                                   | 1.03 (0.74, 1.44) | 1.20 (0.85, 1.69) | 1.55 (1.07, 2.23) | 0.01        |
| p-value                                                                                       |       |                                       | 0.86              | 0.31              | 0.02              |             |
| Model 2                                                                                       | 3,540 | 1.0                                   | 0.91 (0.63, 1.31) | 1.14 (0.78, 1.65) | 1.25 (0.84, 1.88) | 0.16        |
| p-value                                                                                       |       |                                       | 0.61              | 0.50              | 0.27              |             |
| Model 3                                                                                       | 3,540 | 1.0                                   | 0.92 (0.64, 1.32) | 1.14 (0.79, 1.66) | 1.30 (0.87, 1.95) | 0.11        |
| p-value                                                                                       |       |                                       | 0.65              | 0.49              | 0.20              |             |

| Variable                                                                                      | N     | Urinary Sodium Excretion, mg/24 hours |                   |                   |                   | P for trend |
|-----------------------------------------------------------------------------------------------|-------|---------------------------------------|-------------------|-------------------|-------------------|-------------|
|                                                                                               |       | <2,686                                | 2,687 – 3,532     | 3,533 – 4,473     | ≥4,474            |             |
| <b>Stroke</b>                                                                                 |       |                                       |                   |                   |                   |             |
| Events                                                                                        |       | 36                                    | 39                | 39                | 34                |             |
| Person-years                                                                                  |       | 6,045                                 | 6,202             | 6,262             | 6,320             |             |
| Cumulative Incidence <sup>b</sup> , % (95% Confidence Interval) at median 6.8 years follow-up |       | 2.8 (1.8, 3.8)                        | 3.8 (2.6, 5.0)    | 4.7 (3.2, 6.2)    | 5.5 (3.5, 7.4)    | 0.008       |
| Hazard Ratio (95% Confidence Intervals)                                                       |       |                                       |                   |                   |                   |             |
| Model 1                                                                                       | 3,753 | 1.0                                   | 1.39 (0.87, 2.20) | 1.75 (1.07, 2.85) | 2.02 (1.18, 3.47) | 0.008       |
| p-value                                                                                       |       |                                       | 0.17              | 0.03              | 0.01              |             |
| Model 2                                                                                       | 3,542 | 1.0                                   | 1.25 (0.77, 2.02) | 1.74 (1.04, 2.91) | 1.88 (1.07, 3.33) | 0.02        |
| p-value                                                                                       |       |                                       | 0.37              | 0.03              | 0.03              |             |
| Model 3                                                                                       | 3,542 | 1.0                                   | 1.24 (0.77, 2.01) | 1.73 (1.04, 2.89) | 1.91 (1.08, 3.33) | 0.02        |
| p-value                                                                                       |       |                                       | 0.38              | 0.04              | 0.03              |             |

Model 1: Adjusted for age, sex, race, clinic site and urinary creatinine excretion; Model 2: Model 1 plus education, waist circumference, lean body mass index, body mass index, cigarette smoking, alcohol drinking, physical activity, LDL-cholesterol, glucose, history of CVD, use of antidiabetic medications, lipid-lowering medications, diuretics, renin-angiotensin system blocking agents, and other antihypertensive medications, and urinary creatinine excretion; Model 3: Model 2 plus adjustment for baseline eGFR.

<sup>a</sup>Composite CVD is defined as congestive heart failure, stroke, and myocardial infarction; <sup>b</sup>Adjusted for age, sex, race, clinic site and urinary creatinine excretion

**eTable 2. Hazard Ratios and 95% Confidence Intervals of Composite Cardiovascular Disease, Congestive Heart Failure, Myocardial Infarction, and Stroke Associated with a 1,000 mg difference in Calibrated 24-Hour Urinary Sodium Excretion with Additional Adjustment for Total Calorie Intake and Systolic Blood Pressure**

| Subgroups | Calibrated Urinary Sodium Excretion <sup>a</sup> per 1,000 mg/24 hours |                   |         |                          |                   |         |                       |                   |         |        |                   |         |
|-----------|------------------------------------------------------------------------|-------------------|---------|--------------------------|-------------------|---------|-----------------------|-------------------|---------|--------|-------------------|---------|
|           | Composite CVD <sup>b</sup>                                             |                   |         | Congestive Heart Failure |                   |         | Myocardial Infarction |                   |         | Stroke |                   |         |
|           | N                                                                      | HR (95% CI)       | P value | N                        | HR (95% CI)       | P value | N                     | HR (95% CI)       | P value | N      | HR (95% CI)       | P value |
| Model 1   | 3,528                                                                  | 1.10 (1.05, 1.16) | <0.001  | 3,533                    | 1.09 (1.02, 1.15) | 0.005   | 3,540                 | 1.07 (0.98, 1.16) | 0.11    | 3,542  | 1.16 (1.05, 1.28) | 0.003   |
| Model 2   | 2,726                                                                  | 1.11 (1.05, 1.17) | <0.001  | 2,729                    | 1.09 (1.02, 1.17) | 0.01    | 2,736                 | 1.04 (0.95, 1.15) | 0.37    | 2,738  | 1.17 (1.06, 1.30) | 0.002   |
| Model 3   | 3,528                                                                  | 1.10 (1.04, 1.15) | <0.001  | 3,533                    | 1.08 (1.02, 1.14) | 0.01    | 3,540                 | 1.06 (0.98, 1.15) | 0.16    | 3,542  | 1.15 (1.04, 1.27) | 0.006   |

Multivariable model 1: Adjusted for age, sex, race, clinic site, education, waist circumference, lean body mass index, body mass index, cigarette smoking, alcohol drinking, physical activity, LDL-cholesterol, glucose, history of CVD, use of antidiabetic medications, lipid-lowering medications, diuretics, renin-angiotensin system blocking agents, and other antihypertensive medications, urinary creatinine excretion, and baseline eGFR; Multivariable model 2: Model 1 plus adjustment for caloric intake; Multivariable model 3: Model 1 plus adjustment for systolic blood pressure

<sup>a</sup>Calibrated to mean urinary creatinine excretion of 1,569 mg/24 hours in men and 1,130 mg/24 hours in women; <sup>b</sup>Composite CVD is defined as congestive heart failure, stroke, and myocardial infarction

**eTable 3. Characteristics of 3,757 Patients with Chronic Kidney Disease According to Quartile of Calibrated 24-Hour Urinary Potassium Excretion, the Chronic Renal Insufficiency Cohort Study**

| Variable                           | Calibrated Urinary Potassium Excretion <sup>a</sup> , mg/24 hours |                          |                          |                   | p value |
|------------------------------------|-------------------------------------------------------------------|--------------------------|--------------------------|-------------------|---------|
|                                    | <1,608<br>(N=940)                                                 | 1,608 – 2,107<br>(N=939) | 2,108 – 2,750<br>(N=938) | ≥2,751<br>(N=940) |         |
| Age, years                         | 55.0 ± 11.5                                                       | 56.9 ± 11.2              | 58.8 ± 10.3              | 60.4 ± 9.8        | <0.001  |
| Men, N (%)                         | 346 (36.8%)                                                       | 485 (51.7%)              | 570 (60.8%)              | 687 (73.1%)       | <0.001  |
| Race/Ethnicity, N (%)              |                                                                   |                          |                          |                   |         |
| White                              | 189 (20.1%)                                                       | 377 (40.1%)              | 532 (56.7%)              | 678 (72.1%)       | <0.001  |
| Black                              | 696 (74.0%)                                                       | 464 (49.4%)              | 275 (29.3%)              | 122 (13.0%)       |         |
| Other                              | 55 (5.9%)                                                         | 98 (10.4%)               | 131 (14.0%)              | 140 (14.9%)       |         |
| High School Graduate, N (%)        | 715 (76.1%)                                                       | 745 (79.3%)              | 762 (81.3%)              | 788 (83.8%)       | <0.001  |
| Current Smoking N (%)              | 159 (16.9%)                                                       | 141 (15.0%)              | 103 (11.0%)              | 77 (8.2%)         | <0.001  |
| Weekly Alcohol Drinking, N (%)     | 196 (20.9%)                                                       | 239 (25.5%)              | 263 (28.0%)              | 270 (28.7%)       | <0.001  |
| Physical Activity, METs/week       | 208.8 ± 163.5                                                     | 204.2 ± 151.7            | 196.7 ± 136.1            | 186.9 ± 122.9     | 0.006   |
| Hypertension, N (%)                | 823 (87.6%)                                                       | 817 (87.0%)              | 808 (86.1%)              | 785 (83.5%)       | 0.06    |
| Diabetes, N (%)                    | 372 (39.6%)                                                       | 461 (49.1%)              | 468 (49.9%)              | 494 (52.6%)       | <0.001  |
| History of CVD, N (%)              | 290 (30.9%)                                                       | 306 (32.6%)              | 274 (29.2%)              | 369 (39.3%)       | <0.001  |
| Antihypertensive Medication, N (%) | 866 (92.6%)                                                       | 858 (92.3%)              | 852 (91.5%)              | 850 (91.1%)       | 0.62    |
| Diuretics                          | 555 (59.4%)                                                       | 572 (61.5%)              | 537 (57.7%)              | 540 (57.9%)       | 0.31    |
| RAS Blocking Agents                | 647 (69.2%)                                                       | 664 (71.4%)              | 641 (68.9%)              | 615 (65.9%)       | 0.09    |
| Other Antihypertensive Medications | 642 (68.7%)                                                       | 657 (70.6%)              | 646 (69.4%)              | 682 (73.1%)       | 0.16    |
| Lipid-lowering Medication, N (%)   | 483 (51.7%)                                                       | 557 (59.9%)              | 576 (61.9%)              | 621 (66.6%)       | <0.001  |
| Antidiabetic Medication, N (%)     | 324 (34.7%)                                                       | 419 (45.1%)              | 424 (45.5%)              | 445 (47.7%)       | <0.001  |
| Systolic Blood Pressure, mmHg      | 128.0 ± 22.3                                                      | 127.3 ± 21.0             | 128.3 ± 21.3             | 128.7 ± 22.7      | 0.57    |

| Variable                                 | Calibrated Urinary Potassium Excretion <sup>a</sup> , mg/24 hours |                          |                          |                   | p value |
|------------------------------------------|-------------------------------------------------------------------|--------------------------|--------------------------|-------------------|---------|
|                                          | <1,608<br>(N=940)                                                 | 1,608 – 2,107<br>(N=939) | 2,108 – 2,750<br>(N=938) | ≥2,751<br>(N=940) |         |
| Diastolic Blood Pressure, mmHg           | 72.9 ± 13.5                                                       | 71.6 ± 12.5              | 71.2 ± 12.5              | 70.2 ± 12.3       | <0.001  |
| Waist Circumference, cm                  | 106.3 ± 18.4                                                      | 106.7 ± 18.0             | 105.7 ± 16.8             | 104.0 ± 16.3      | 0.005   |
| Body Mass Index, kg/m <sup>2</sup>       | 33.2 ± 8.5                                                        | 32.4 ± 7.6               | 31.6 ± 7.1               | 30.5 ± 6.8        | <0.001  |
| Lean Body Mass Index, kg/m <sup>2</sup>  | 20.6 ± 4.0                                                        | 21.0 ± 4.2               | 21.1 ± 4.2               | 21.2 ± 4.2        | 0.006   |
| Daily Total Calorie Intake, kcal         | 1,820 ± 857                                                       | 1,838 ± 855              | 1,834 ± 823              | 1,834 ± 734       | 0.98    |
| LDL Cholesterol, mg/dL                   | 107.6 ± 38.0                                                      | 101.3 ± 34.6             | 102.8 ± 36.0             | 97.9 ± 32.5       | <0.001  |
| HDL Cholesterol, mg/dL                   | 48.5 ± 16.3                                                       | 47.3 ± 14.8              | 47.1 ± 15.1              | 47.0 ± 15.6       | 0.13    |
| Triglycerides, mg/dL                     | 148.6 ± 112.7                                                     | 163.0 ± 136.0            | 158.0 ± 112.3            | 156.3 ± 101.0     | 0.06    |
| Glucose, mg/dL                           | 109.4 ± 45.9                                                      | 116.0 ± 51.8             | 116.1 ± 52.0             | 116.9 ± 50.3      | 0.004   |
| HbA1c, %                                 | 6.5 ± 1.5                                                         | 6.7 ± 1.6                | 6.7 ± 1.5                | 6.7 ± 1.5         | 0.13    |
| Urinary Creatinine, mg/24 hr             | 1,429 ± 499                                                       | 1,403 ± 488              | 1,378 ± 454              | 1,285 ± 407       | <0.001  |
| Urinary Sodium, mg/24 hr                 | 3,450 ± 1,295                                                     | 3,676 ± 1,391            | 3,802 ± 1,440            | 3,876 ± 1,594     | <0.001  |
| Urinary Potassium, mg/24 hr              | 1,420 ± 469                                                       | 1,891 ± 540              | 2,321 ± 623              | 3,012 ± 1,130     | <0.001  |
| Calibrated Sodium Excretion, mg/24 hr    | 3,237 ± 1,099                                                     | 3,668 ± 1,092            | 3,994 ± 1,314            | 4,564 ± 1,853     | <0.001  |
| Calibrated Potassium Excretion, mg/24 hr | 1,300 ± 226                                                       | 1,861 ± 144              | 2,399 ± 182              | 3,495 ± 937       | <0.001  |
| Urinary Protein, g/24 hr                 | 0.16 (0.07, 0.76)                                                 | 0.19 (0.07, 0.95)        | 0.17 (0.07, 0.86)        | 0.21 (0.08, 1.11) | 0.02    |
| eGFR, ml/min/1.73 m <sup>2</sup>         | 44.5 ± 15.8                                                       | 44.1 ± 14.9              | 44.7 ± 14.2              | 44.7 ± 14.7       | 0.80    |

Values are percentage of participants, mean ± standard deviation, or median (interquartile range). CVD = cardiovascular disease; RAS = renin-angiotensin system; LDL = low-density lipoprotein; HDL = high-density lipoprotein; HbA1c = glycated hemoglobin; and eGFR = estimated-glomerular filtration rate.

<sup>a</sup>Calibrated to mean urinary creatinine excretion of 1,569 mg/24 hours in men and 1,130 mg/24 hours in women.

**eTable 4. Hazard Ratios and 95% Confidence Intervals of Composite Cardiovascular Disease, Congestive Heart Failure, Myocardial Infarction, and Stroke According to Quartile of Calibrated 24-Hour Urinary Potassium Excretion**

| Variable                                                                                      | N     | Calibrated Urinary Potassium Excretion <sup>a</sup> , mg/24 hours |                   |                   |                   | P for trend |
|-----------------------------------------------------------------------------------------------|-------|-------------------------------------------------------------------|-------------------|-------------------|-------------------|-------------|
|                                                                                               |       | <1,608                                                            | 1,608 – 2,107     | 2,108 – 2,750     | ≥2,751            |             |
| No. of Participants                                                                           |       | 940                                                               | 939               | 938               | 940               |             |
| <b>Composite CVD<sup>b</sup></b>                                                              |       |                                                                   |                   |                   |                   |             |
| Events                                                                                        |       | 185                                                               | 203               | 177               | 239               |             |
| Person-years                                                                                  |       | 5,833                                                             | 5,628             | 5,654             | 5,410             |             |
| Cumulative Incidence <sup>c</sup> , % (95% Confidence Interval) at median 6.8 years follow-up |       | 17.2 (14.7, 19.6)                                                 | 20.5 (17.9, 23.0) | 20.2 (17.4, 22.8) | 28.2 (24.8, 31.4) | <0.001      |
| Hazard Ratio (95% Confidence Intervals)                                                       |       |                                                                   |                   |                   |                   |             |
| Model 1                                                                                       | 3,736 | 1.0                                                               | 1.22 (1.00, 1.50) | 1.20 (0.96, 1.51) | 1.80 (1.43, 2.27) | <0.001      |
| p-value                                                                                       |       |                                                                   | 0.05              | 0.11              | <0.001            |             |
| Model 2                                                                                       | 3,528 | 1.0                                                               | 1.02 (0.82, 1.27) | 1.00 (0.79, 1.26) | 1.20 (0.93, 1.54) | 0.15        |
| p-value                                                                                       |       |                                                                   | 0.82              | 0.98              | 0.17              |             |
| Model 3                                                                                       | 3,528 | 1.0                                                               | 1.04 (0.84, 1.29) | 1.02 (0.81, 1.30) | 1.26 (0.98, 1.63) | 0.06        |
| p-value                                                                                       |       |                                                                   | 0.72              | 0.84              | 0.07              |             |
| <b>Congestive Heart Failure</b>                                                               |       |                                                                   |                   |                   |                   |             |
| Events                                                                                        |       | 134                                                               | 141               | 131               | 169               |             |
| Person-years                                                                                  |       | 6,025                                                             | 5,844             | 5,879             | 5,640             |             |
| Cumulative Incidence <sup>c</sup> , % (95% Confidence Interval) at median 6.8 years follow-up |       | 11.9 (9.9, 14.0)                                                  | 14.3 (12.1, 16.5) | 15.2 (12.7, 17.6) | 21.1 (18.0, 24.2) | <0.001      |



| Variable                                                                                      | N     | Calibrated Urinary Potassium Excretion <sup>a</sup> , mg/24 hours |                   |                   |                   | P for trend |
|-----------------------------------------------------------------------------------------------|-------|-------------------------------------------------------------------|-------------------|-------------------|-------------------|-------------|
|                                                                                               |       | <1,608                                                            | 1,608 – 2,107     | 2,108 – 2,750     | ≥2,751            |             |
| Hazard Ratio (95% Confidence Intervals)                                                       |       |                                                                   |                   |                   |                   |             |
| Model 1                                                                                       | 3,741 | 1.0                                                               | 1.22 (0.96, 1.56) | 1.30 (1.00, 1.70) | 1.91 (1.45, 2.51) | <0.001      |
| p-value                                                                                       |       |                                                                   | 0.11              | 0.05              | <0.001            |             |
| Model 2                                                                                       | 3,533 | 1.0                                                               | 0.95 (0.73, 1.23) | 1.01 (0.77, 1.34) | 1.16 (0.86, 1.57) | 0.23        |
| p-value                                                                                       |       |                                                                   | 0.68              | 0.92              | 0.34              |             |
| Model 3                                                                                       | 3,533 | 1.0                                                               | 0.96 (0.74, 1.24) | 1.40 (0.79, 1.38) | 1.23 (0.91, 1.66) | 0.12        |
| p-value                                                                                       |       |                                                                   | 0.76              | 0.76              | 0.18              |             |
| <b>Myocardial Infarction</b>                                                                  |       |                                                                   |                   |                   |                   |             |
| Events                                                                                        |       | 66                                                                | 77                | 72                | 90                |             |
| Person-years                                                                                  |       | 6,279                                                             | 6,067             | 6,072             | 5,857             |             |
| Cumulative Incidence <sup>c</sup> , % (95% Confidence Interval) at median 6.8 years follow-up |       | 7.2 (5.4, 9.1)                                                    | 8.3 (6.4, 10.0)   | 7.9 (6.1, 9.6)    | 9.7 (7.6, 11.8)   | 0.12        |
| Hazard Ratio (95% Confidence Intervals)                                                       |       |                                                                   |                   |                   |                   |             |
| Model 1                                                                                       | 3,751 | 1.0                                                               | 1.15 (0.82, 1.61) | 1.09 (0.76, 1.57) | 1.36 (0.93, 1.99) | 0.12        |
| p-value                                                                                       |       |                                                                   | 0.43              | 0.65              | 0.11              |             |
| Model 2                                                                                       | 3,540 | 1.0                                                               | 1.07 (0.74, 1.54) | 0.95 (0.64, 1.41) | 0.99 (0.65, 1.52) | 0.86        |
| p-value                                                                                       |       |                                                                   | 0.71              | 0.81              | 0.98              |             |
| Model 3                                                                                       | 3,540 | 1.0                                                               | 1.08 (0.75, 1.56) | 0.98 (0.66, 1.45) | 1.04 (0.68, 1.58) | 0.99        |
| p-value                                                                                       |       |                                                                   | 0.66              | 0.90              | 0.87              |             |

| Variable                                                                                      | N     | Calibrated Urinary Potassium Excretion <sup>a</sup> , mg/24 hours |                   |                   |                   | P for trend |
|-----------------------------------------------------------------------------------------------|-------|-------------------------------------------------------------------|-------------------|-------------------|-------------------|-------------|
|                                                                                               |       | <1,608                                                            | 1,608 – 2,107     | 2,108 – 2,750     | ≥2,751            |             |
| <b>Stroke</b>                                                                                 |       |                                                                   |                   |                   |                   |             |
| Events                                                                                        |       | 38                                                                | 39                | 30                | 41                |             |
| Person-years                                                                                  |       | 6,354                                                             | 6,233             | 6,218             | 6,024             |             |
| Cumulative Incidence <sup>c</sup> , % (95% Confidence Interval) at median 6.8 years follow-up |       | 3.1 (2.0, 4.2)                                                    | 3.7 (2.5, 4.9)    | 3.6 (2.3, 4.9)    | 5.7 (3.7, 7.6)    | 0.02        |
| Hazard Ratio (95% Confidence Intervals)                                                       |       |                                                                   |                   |                   |                   |             |
| Model 1                                                                                       | 3,753 | 1.0                                                               | 1.18 (0.75, 1.86) | 1.14 (0.68, 1.91) | 1.86 (1.09, 3.16) | 0.02        |
| p-value                                                                                       |       |                                                                   | 0.48              | 0.62              | 0.02              |             |
| Model 2                                                                                       | 3,542 | 1.0                                                               | 1.01 (0.63, 1.64) | 1.03 (0.60, 1.75) | 1.38 (0.78, 2.43) | 0.24        |
| p-value                                                                                       |       |                                                                   | 0.95              | 0.92              | 0.26              |             |
| Model 3                                                                                       | 3,542 | 1.0                                                               | 1.03 (0.64, 1.66) | 1.04 (0.61, 1.77) | 1.41 (0.80, 2.48) | 0.22        |
| p-value                                                                                       |       |                                                                   | 0.91              | 0.88              | 0.24              |             |

Multivariable model 1: Adjusted for age, sex, race and clinic site; Multivariable model 2: Model 1 plus education, waist circumference, lean body mass index, body mass index, cigarette smoking, alcohol drinking, physical activity, glucose, LDL-cholesterol, history of CVD, use of antidiabetic medications, lipid-lowering medications, diuretics, renin-angiotensin system blocking agents, and other antihypertensive medications, and urinary creatinine excretion; Multivariable model 3: Model 2 plus baseline eGFR.

<sup>a</sup>Calibrated to mean urinary creatinine excretion of 1,569 mg/24 hours in men and 1,130 mg/24 hours in women; <sup>b</sup>Composite CVD is defined as congestive heart failure, stroke, and myocardial infarction; <sup>c</sup>Adjusted for age, sex, race and clinic site.

**eTable 5. P-values for Non-linear and Linear Associations between 24-hour Urinary Sodium Excretion and Cardiovascular Disease: Restricted Cubic Spline Regression using Alternate Numbers of Knots and Middle Knot Locations**

| Spline Model                     | Composite CVD       |                 | CHF                 |                 | MI                  |                 | Stroke              |                 |
|----------------------------------|---------------------|-----------------|---------------------|-----------------|---------------------|-----------------|---------------------|-----------------|
|                                  | P for non-linearity | P for linearity |
| 3 knots @ 5, 50, 95%             | 0.11                | <0.001          | 0.04                | 0.004           | 0.21                | 0.12            | 0.21                | <0.001          |
| 4 knots @ 5, 35, 65, 95%         | 0.23                | <0.001          | 0.12                | 0.004           | 0.29                | 0.12            | 0.29                | <0.001          |
| 5 knots @ 5, 27.5, 50, 72.5, 95% | 0.22                | <0.001          | 0.12                | 0.004           | 0.42                | 0.12            | 0.46                | <0.001          |
| 3 knots @ 5%, 3,800 mg/day, 95%  | 0.11                | <0.001          | 0.04                | 0.004           | 0.22                | 0.12            | 0.22                | <0.001          |
| 3 knots @ 5%, 4,000 mg/day, 95%  | 0.11                | <0.001          | 0.04                | 0.004           | 0.22                | 0.12            | 0.22                | <0.001          |

CVD=cardiovascular disease; CHF=congestive heart failure; MI=myocardial infarction

**eFigure 1. Multiple-adjusted Hazard Ratios and 95% Confidence Intervals of Cardiovascular Disease Associated with 24-hour Urinary Sodium Excretion**

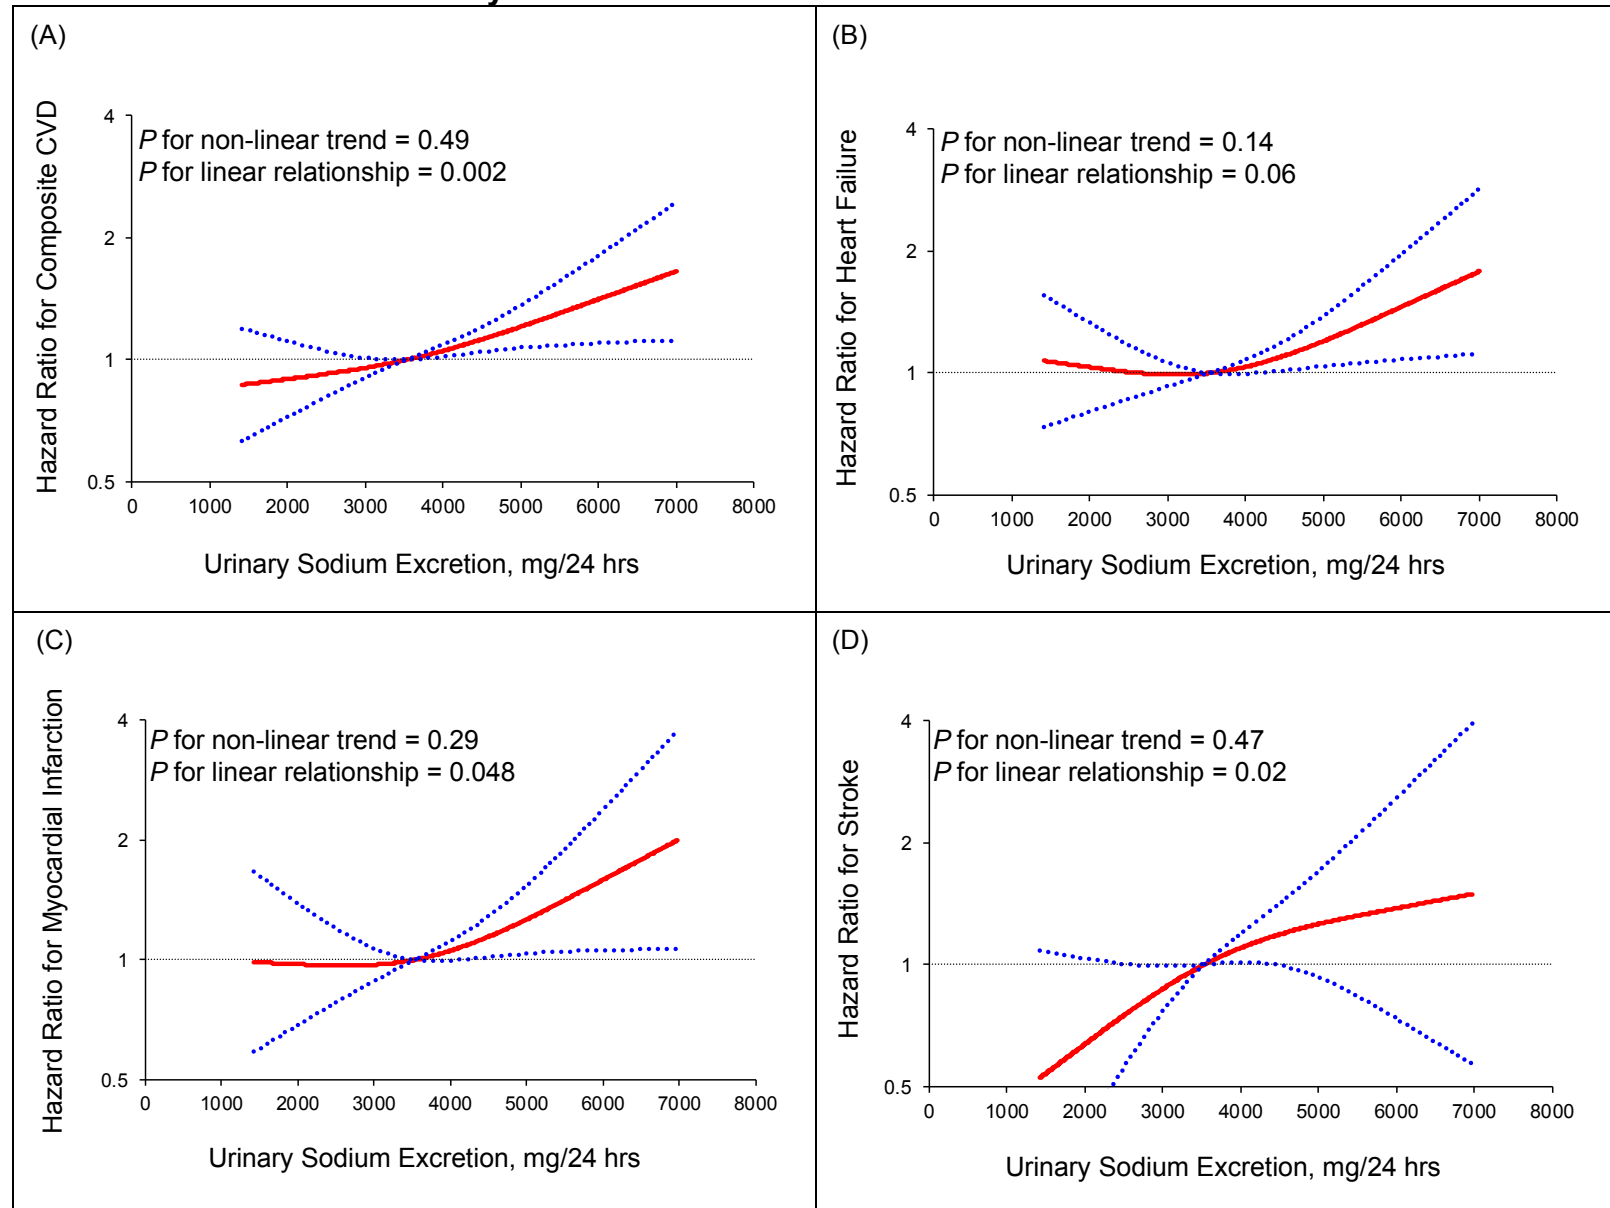

(A) Composite Cardiovascular Disease, (B) Congestive Heart Failure, (C) Myocardial Infarction, and (D) Stroke. Adjusted for age, sex, race, clinic site, education, waist circumference, lean body mass index, body mass index, cigarette smoking, alcohol drinking, physical activity, glucose, LDL-cholesterol, history of CVD, use of antidiabetic medications, lipid-lowering medications, diuretics, renin-angiotensin system blocking agents, and other antihypertensive medications, urinary creatinine excretion, and baseline eGFR.

**eFigure 2. Cumulative Kaplan Meier Estimates of Cardiovascular Diseases According to Quartile of Calibrated 24-Hour Urinary Potassium Excretion**

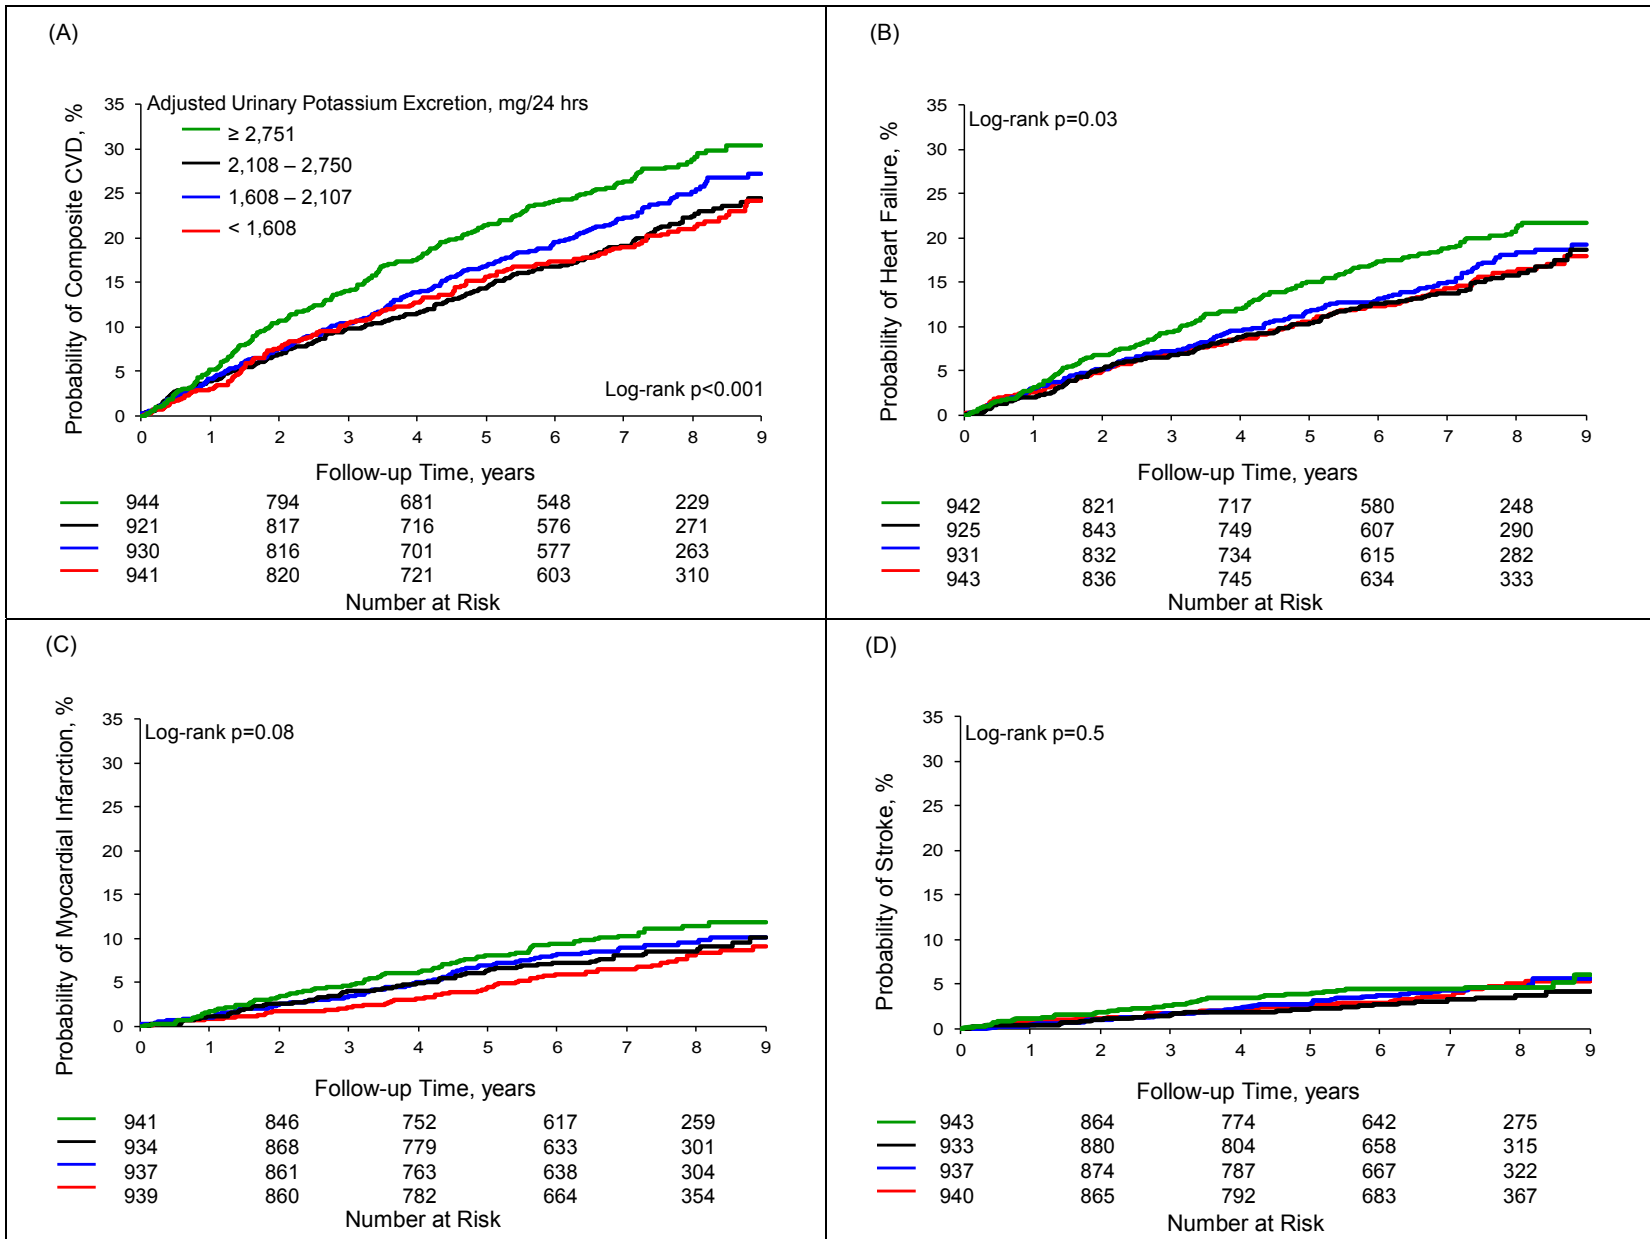

(A) Composite Cardiovascular Disease, (B) Congestive Heart Failure, (C) Myocardial Infarction, and (D) Stroke

**eFigure 3. Multiple-adjusted Hazard Ratios and 95% Confidence Intervals of Cardiovascular Disease Associated with Calibrated 24-hour Urinary Potassium Excretion**

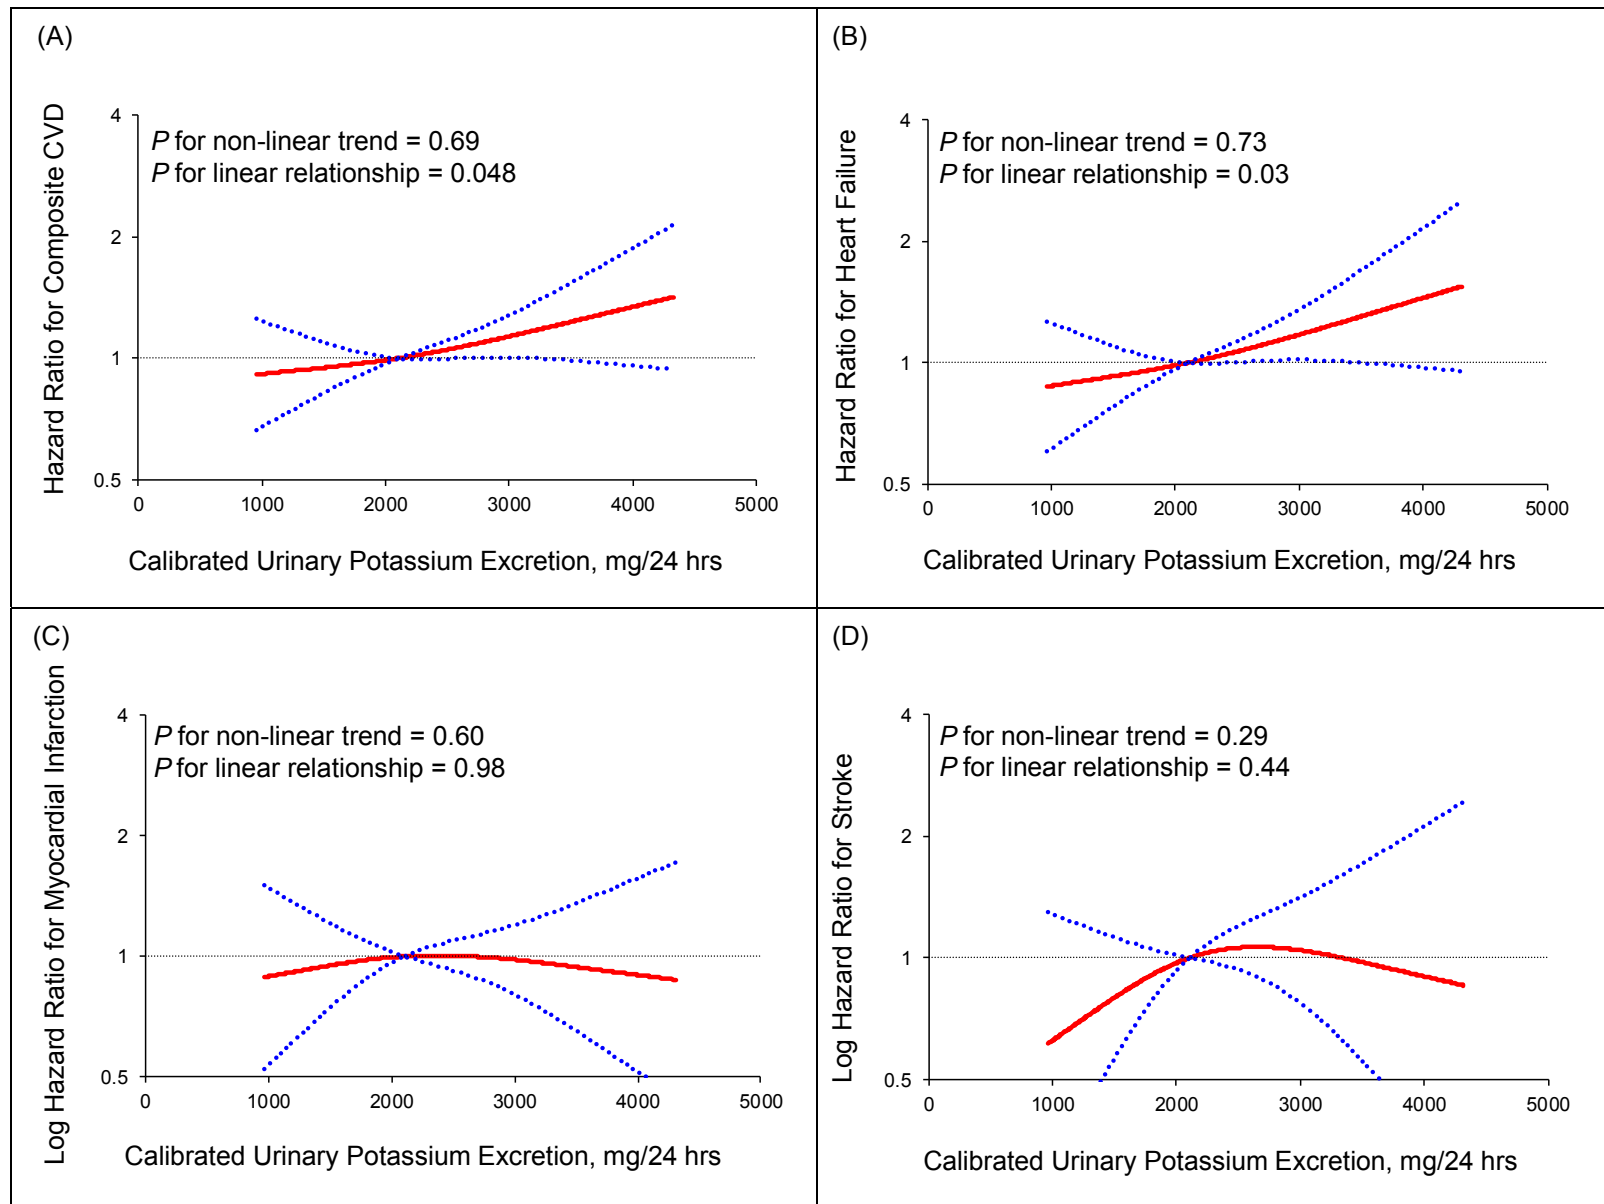

(A) Composite Cardiovascular Disease, (B) Congestive Heart Failure, (C) Myocardial Infarction, and (D) Stroke. Adjusted for age, sex, race, clinic site, education, waist circumference, lean body mass index, body mass index, cigarette smoking, alcohol drinking, physical activity, glucose, LDL-cholesterol, history of CVD, use of antidiabetic medications, lipid-lowering medications, diuretics, renin-angiotensin system blocking agents, and other antihypertensive medications, urinary creatinine excretion, and baseline eGFR.
